# Supplementary material for: COVID-19-Stresstest für die Sicherstellung der Notfallversorgung: Strategie und Maßnahmen der Notfallrettung in Berlin
Source: Springer Nature journal article supplement (doi:10.1007/s00101-020-00890-8), 2020-11-27
Supplement: MOESM1 [file 18634366]

## Zusatzmaterial zum Beitrag

### „COVID-19 – Stresstest für die Sicherstellung der Notfallversorgung: Strategie und Maßnahmen der Notfallrettung in Berlin“

Janosch Dahmen<sup>1 2 3</sup>, Linnart Bäker<sup>1</sup>, Florian Breuer<sup>1 2</sup>, Karsten Homrighausen<sup>1</sup>, Christopher Pommerenke<sup>1</sup>, Jan-Karl Stiepak<sup>1 2</sup>, Stefan Poloczek<sup>1 2</sup>,

<sup>1</sup> Berliner Feuerwehr

<sup>2</sup> Ärztliche Leitung Rettungsdienst im Land Berlin

<sup>3</sup> Universität Witten/Herdecke, Fakultät für Gesundheit, Department Humanmedizin

Publikation in *Der Anaesthetist* 2020

Der dazugehörige Beitrag und das Zusatzmaterial stehen Ihnen auf [www.springermedizin.de](http://www.springermedizin.de) zur Verfügung. Bitte geben Sie dort den Beitragstitel in die Suche ein.

#### FALLDEFINITIONEN UND KURZLAGEMELDUNGEN IN ANALOGIE ZUR RKI-FALLDEFINITION

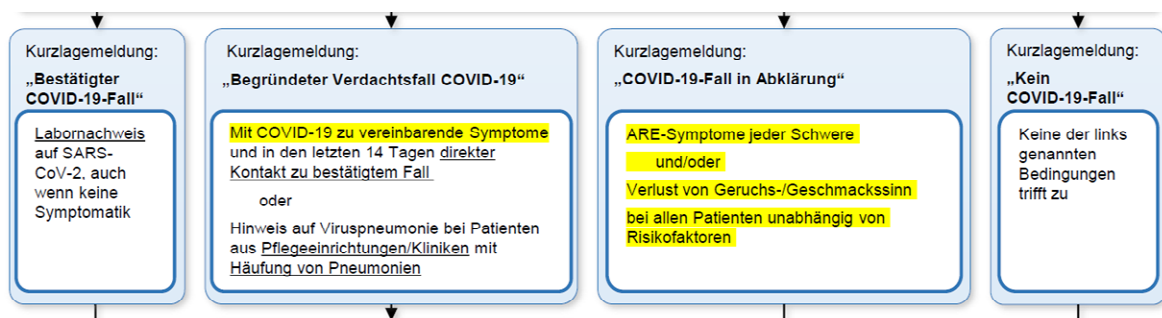

#### LIVE-DATEN ZUM LONGITUDINALEN COVID-19 EINSATZAUFKOMMEN IN DER FIRE APP

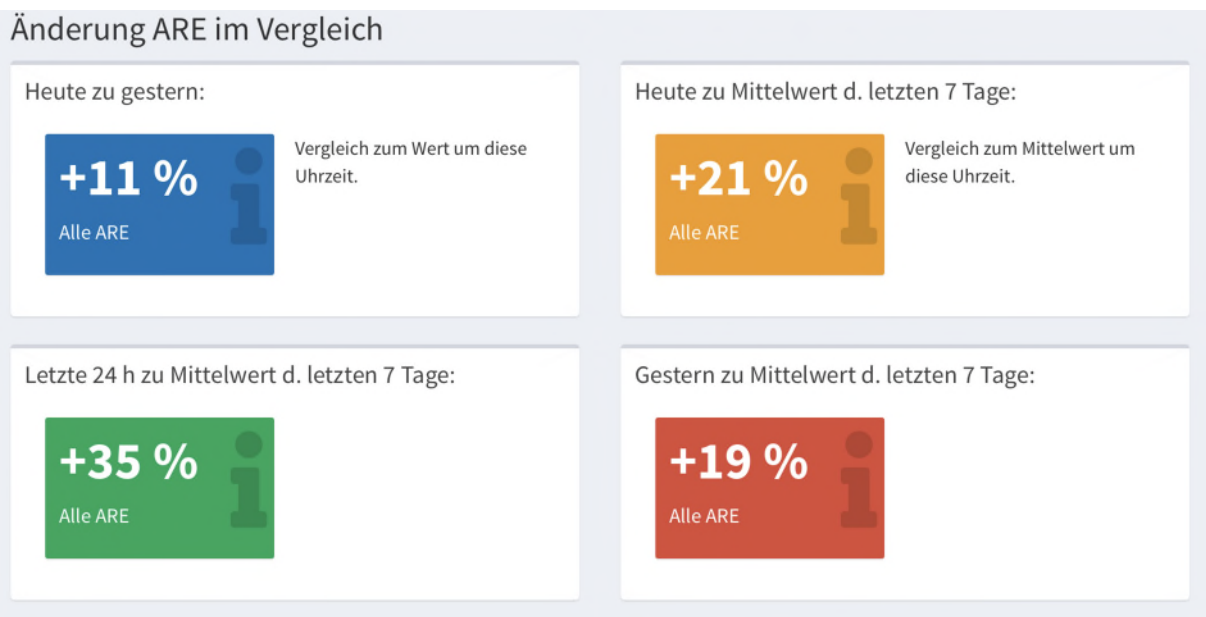

LIVE-DATEN ZU EINEM LAUFENDEN COVID-19 EINSATZ IN DER FIRE APP AUF DEM IPAD DES EINSATZFAHRZEUG

☰ Einsätze
Einsatzdetails i

## NT ARE.

Kurzinfo:  
*Corona bestätigt --> Einweisung durch Amtsarzt*

Einsatz-Nr  
**1328**

Alarmzeit  
**22:34**

### Einsatzmittel

Vor Ort Seit

Noch keine Einheiten vor Ort

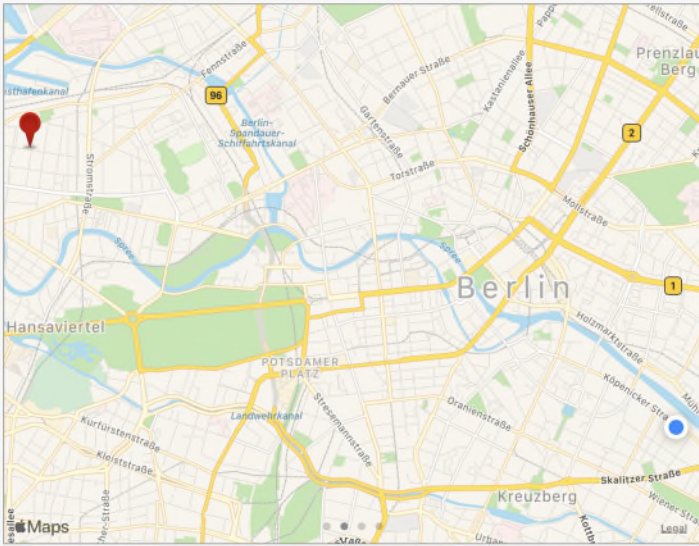

### Alarmiert

Vor Ort in (ca)

+

**RTW 1700/1**

+4 min

Einsatzdauer  
**08m 39s**

Einsatzstatus  
**Aktiv**

Funkgruppe  
---

[Details anzeigen](#)

Krankenhäuser Transporte Abschnitte Hydranten Objektplan

LIVE-DATEN ZUM EINSATZAUFKOMMEN IN PFLEGEINRICHTUNGEN IN FIRE ANALYTICS

Erfasste Einsätze in organisierten Wohnformen

Anzahl Einsätze in Pflegeeinrichtungen: 282

Anzahl Einsätze / je 1000 Heimplätze: 8.6

### Alle Einsätze

pro Tag und pro 1000 Betten

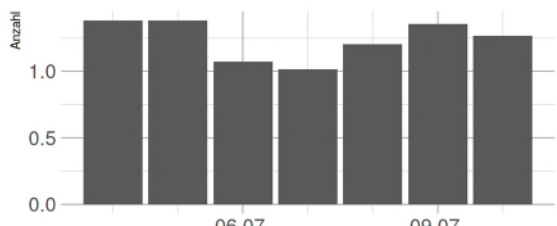

| Datum  | Anzahl |
|--------|--------|
| 06.07. | ~1.1   |
| 07.07. | ~1.0   |
| 08.07. | ~1.2   |
| 09.07. | ~1.3   |
| 10.07. | ~1.2   |

Cave: nicht zu verwechseln mit 7 Tage pro 1000 Betten. Betten insgesamt: 32628
